# Supplementary material
Source: publisher figshare collection journal article supplement (https://tandf.figshare.com/ndownloader/files/18599411)
Supplement: Supplementary file 1 [file 18599411]

| **Supplementary Table 1.** Association between level of PTSS and reported need of support (from univariate logistic regression models). | | | |
| --- | --- | --- | --- |
|  | n | OR (95% CI) | *P*-value |
| Need of support from social workers, T5 | 20 | 2.167 (.546-8.593) | .271 |
| Need of support from psychologists, T5 | 20 | 1.090 (.986-1.206) | .092 |
| Need of support from partners, T5 | N/A | N/A | N/A |
| Need of support from friends, T5 | N/A | N/A | N/A |
| Need of support from social workers, T6 | 37 | 1.065 (1.003-1.131) | **.040** |
| Need of support from psychologists, T6 | 37 | 1.018 (.968-1.071) | .482 |
| Need of support from partners, T6 | N/A | N/A | N/A |
| Need of support from friends, T6 | 37 | 1.048 (.924-1.189) | .464 |
| Need of support from social workers, T7 | 37 | 1.123 (1.026-1.229) | **.012** |
| Need of support from psychologists, T7 | 37 | 1.166 (1.036-1.313) | **.011** |
| Need of support from partners, T7 | 32 | 1.008 (.920-1.104) | .870 |
| Need of support from friends, T7 | 37 | .999 (.943-1.059) | .982 |
| Note: Assessments took place nine months (T5), eighteen months (T6), and five years after the child’s death (T7). N/A, not applicable as all mothers and fathers reported a need of support from their friend and partner at T5 and partner at T6. CI, confidence interval. | | | |
